# Supplementary material
Source: HighWire-hosted journal article supplement (https://www.annfammed.org/highwire/filestream/8154/field_highwire_adjunct_files/1/Gilchrist_Appendix_2.pdf)
Supplement: Gilchrist_Appendix_2.pdf [file Gilchrist_Appendix_2.pdf]

Online Supplementary Material

Gilchrist V, McCord G, Schrop SL, et al. Physician activities during time out of the examination room. *Ann Fam Med*. 2005;3:494-499.

<http://www.annfammed.org/cgi/content/full/3/6/494/DC1>

**Supplemental Appendix 2. Physician Questionnaire**

Please estimate the amount of time that you spend in each of these activities from the time that you get to your office until the time you leave.

|                                                                              | Average Day<br>Hours / Minutes | Today<br>Hours / Minutes |
|------------------------------------------------------------------------------|--------------------------------|--------------------------|
| Direct patient care                                                          | ____ / ____                    | ____ / ____              |
| Chart work and dictating                                                     | ____ / ____                    | ____ / ____              |
| Reading and writing                                                          | ____ / ____                    | ____ / ____              |
| Telephone calls                                                              | ____ / ____                    | ____ / ____              |
| Conversations with staff, nurses, other<br>physicians, patient's family, etc | ____ / ____                    | ____ / ____              |
| Teaching                                                                     | ____ / ____                    | ____ / ____              |
| Committees and meetings                                                      | ____ / ____                    | ____ / ____              |
| Other                                                                        | ____ / ____                    | ____ / ____              |
